# Supplementary material for: Ruta chalepensis L. In Vitro Cultures as a Source of Bioactive Furanocoumarins and Furoquinoline Alkaloids
Source: MDPI journal article supplement (doi:10.3390/life13020457), 2023-02-06
Supplement: s1 [file s1]

## SUPPLEMENTARY FILES

### *Ruta chalepensis* L. *in vitro* cultures as a source of bioactive furanocoumarins and furoquinoline alkaloids

#### I. HPLC ANALYSIS

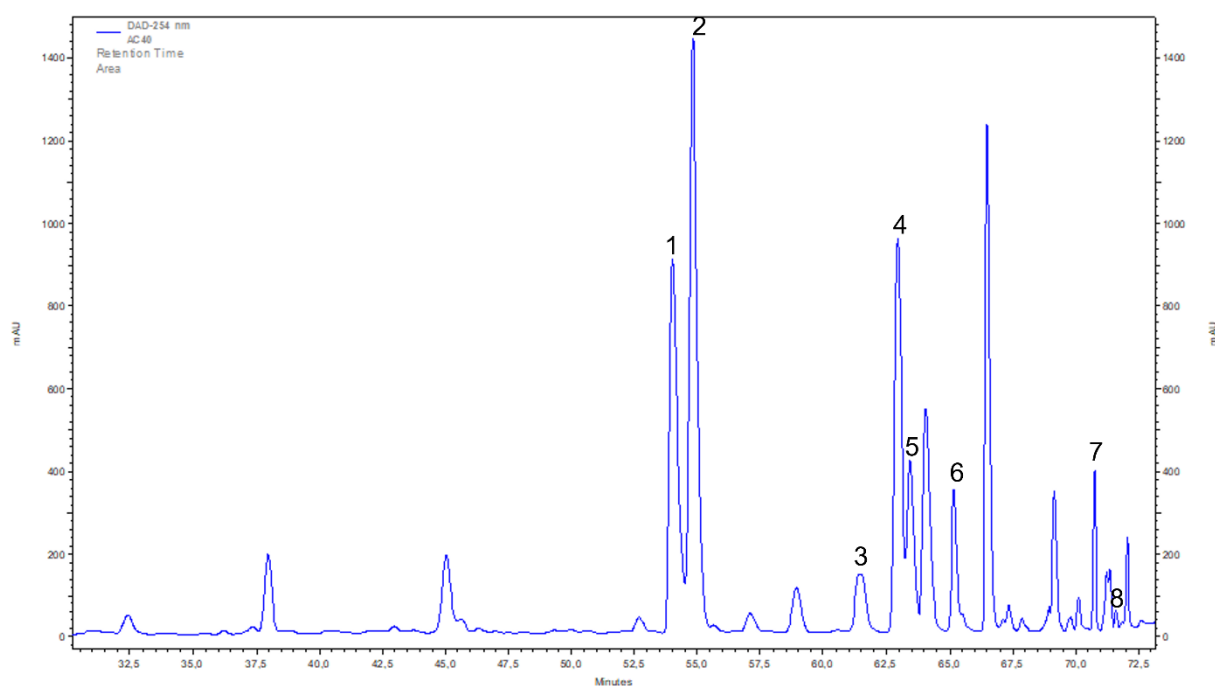

**Figure S1** Sample chromatogram of the extract from *Ruta chalepensis* *in vitro* cultures (LS NAA/BAP 0.1/0.1 mg/L medium, 5-week growth cycle) 1. psoralen, 2. xanthotoxin, 3. isopimpinellin, 4. skimmianine, 5. bergapten, 6.  $\gamma$ -fagarine, 7. isoimperatorin, 8. 7-isopentenylxy- $\gamma$ -fagarine

#### 2. STATISTICAL ANALYSIS

Statistical analysis of the content of individual secondary metabolites and comparison of homogeneous groups. Two-way analysis of variance (ANOVA), NIR poshoc test, dependent variable - metabolite content [mg/100 g DW], independent variables - culture cycle (4, 5 weeks) and LS medium variant (NAA/BAP 0.5/1.0, 0.1/0.1, 1.0/1.0 mg/L).

## Xanthotoxin

| Test NIR; zmienna mg/100 g DM (rch Rity publ Life do statystyki)<br>Prawdopodobieństwa dla testów post-hoc<br>Błąd: MS międzygrupowe = 1638,3, df = 12,000 |      |                   |          |          |          |          |          |          |
|------------------------------------------------------------------------------------------------------------------------------------------------------------|------|-------------------|----------|----------|----------|----------|----------|----------|
| Nr podkl.                                                                                                                                                  | week | LS medium variant | {1}      | {2}      | {3}      | {4}      | {5}      | {6}      |
| 1                                                                                                                                                          | 4    | 0,5/1             | 592,57   | 603,96   | 375,43   | 425,23   | 486,72   | 444,87   |
| 2                                                                                                                                                          | 4    | 0,1/0,1           | 0,736191 | 0,736191 | 0,000027 | 0,000278 | 0,007591 | 0,000767 |
| 3                                                                                                                                                          | 4    | 1,0/1,0           | 0,000027 | 0,000016 | 0,000016 | 0,000158 | 0,004013 | 0,000423 |
| 4                                                                                                                                                          | 5    | 0,5/1             | 0,000278 | 0,000158 | 0,157745 | 0,157745 | 0,005598 | 0,057434 |
| 5                                                                                                                                                          | 5    | 0,1/0,1           | 0,007591 | 0,004013 | 0,005598 | 0,087480 | 0,087480 | 0,563313 |
| 6                                                                                                                                                          | 5    | 1,0/1,0           | 0,000767 | 0,000423 | 0,057434 | 0,563313 | 0,229473 | 0,229473 |

| Test NIR; zmienna mg/100 g DM (rch Rity publ Life do statystyki) Grupy jednorodne, alfa = ,05000 Błąd: MS międzygrupowe = 1638,3, df = 12,000 |      |                   |                     |      |      |      |
|-----------------------------------------------------------------------------------------------------------------------------------------------|------|-------------------|---------------------|------|------|------|
| Nr podkl.                                                                                                                                     | week | LS medium variant | mg/100 g DM Średnie | 1    | 2    | 3    |
| 3                                                                                                                                             | 4    | 1,0/1,0           | 375,4320            | **** |      |      |
| 4                                                                                                                                             | 5    | 0,5/1             | 425,2270            | **** | **** |      |
| 6                                                                                                                                             | 5    | 1,0/1,0           | 444,8696            | **** | **** |      |
| 5                                                                                                                                             | 5    | 0,1/0,1           | 486,7153            |      | **** |      |
| 1                                                                                                                                             | 4    | 0,5/1             | 592,5681            |      |      | **** |
| 2                                                                                                                                             | 4    | 0,1/0,1           | 603,9641            |      |      | **** |

## Bergapten

| Test NIR; zmienna mg/100 g DM (rch Rity publ Life do statystyki)<br>Prawdopodobieństwa dla testów post-hoc<br>Błąd: MS międzygrupowe = 162,02, df = 12,000 |      |                   |          |          |          |          |          |          |
|------------------------------------------------------------------------------------------------------------------------------------------------------------|------|-------------------|----------|----------|----------|----------|----------|----------|
| Nr podkl.                                                                                                                                                  | week | LS medium variant | {1}      | {2}      | {3}      | {4}      | {5}      | {6}      |
| 1                                                                                                                                                          | 4    | 0,5/1             | 244,76   | 196,89   | 135,81   | 136,17   | 129,81   | 147,85   |
| 2                                                                                                                                                          | 4    | 0,1/0,1           | 0,000605 | 0,000605 | 0,000000 | 0,000000 | 0,000000 | 0,000001 |
| 3                                                                                                                                                          | 4    | 1,0/1,0           | 0,000000 | 0,000075 | 0,000075 | 0,000079 | 0,000031 | 0,000498 |
| 4                                                                                                                                                          | 5    | 0,5/1             | 0,000000 | 0,000079 | 0,973043 | 0,973043 | 0,574291 | 0,269432 |
| 5                                                                                                                                                          | 5    | 0,1/0,1           | 0,000000 | 0,000031 | 0,574291 | 0,551969 | 0,551969 | 0,283241 |
| 6                                                                                                                                                          | 5    | 1,0/1,0           | 0,000001 | 0,000498 | 0,269432 | 0,283241 | 0,108256 | 0,108256 |

| Test NIR; zmienna mg/100 g DM (rch Rity publ Life do statystyki) Grupy jednorodne, alfa = ,05000 Błąd: MS międzygrupowe = 162,02, df = 12,000 |      |                   |                     |      |      |      |
|-----------------------------------------------------------------------------------------------------------------------------------------------|------|-------------------|---------------------|------|------|------|
| Nr podkl.                                                                                                                                     | week | LS medium variant | mg/100 g DM Średnie | 1    | 2    | 3    |
| 5                                                                                                                                             | 5    | 0,1/0,1           | 129,8126            | **** |      |      |
| 3                                                                                                                                             | 4    | 1,0/1,0           | 135,8144            | **** |      |      |
| 4                                                                                                                                             | 5    | 0,5/1             | 136,1730            | **** |      |      |
| 6                                                                                                                                             | 5    | 1,0/1,0           | 147,8486            | **** |      |      |
| 2                                                                                                                                             | 4    | 0,1/0,1           | 196,8916            |      | **** |      |
| 1                                                                                                                                             | 4    | 0,5/1             | 244,7564            |      |      | **** |

## Isopimpinellin

| Test NIR; zmienna mg/100 g DM (rch Rity publ Life do statystyki)<br>Prawdopodobieństwa dla testów post-hoc<br>Błąd: MS międzygrupowe = 69,025, df = 12,000 |      |                   |          |          |          |          |          |          |
|------------------------------------------------------------------------------------------------------------------------------------------------------------|------|-------------------|----------|----------|----------|----------|----------|----------|
| Nr podkl.                                                                                                                                                  | week | LS medium variant | {1}      | {2}      | {3}      | {4}      | {5}      | {6}      |
| 1                                                                                                                                                          | 4    | 0,5/1             | 54,973   | 55,655   | 75,578   | 29,086   | 36,366   | 84,482   |
| 2                                                                                                                                                          | 4    | 0,1/0,1           | 0,921559 | 0,921559 | 0,010323 | 0,002456 | 0,017834 | 0,000945 |
| 3                                                                                                                                                          | 4    | 1,0/1,0           | 0,010323 | 0,012444 | 0,012444 | 0,002047 | 0,014800 | 0,001129 |
| 4                                                                                                                                                          | 5    | 0,5/1             | 0,002456 | 0,002047 | 0,000018 | 0,000018 | 0,000087 | 0,213894 |
| 5                                                                                                                                                          | 5    | 0,1/0,1           | 0,017834 | 0,014800 | 0,000087 | 0,304268 | 0,304268 | 0,000003 |
| 6                                                                                                                                                          | 5    | 1,0/1,0           | 0,000945 | 0,001129 | 0,213894 | 0,000003 | 0,000013 | 0,000013 |

| Test NIR; zmienna mg/100 g DM (rch Rity publ Life do statystyki) Grupy jednorodne, alfa = ,05000 Błąd: MS międzygrupowe = 69,025, df = 12,000 |      |                   |                     |      |      |      |
|-----------------------------------------------------------------------------------------------------------------------------------------------|------|-------------------|---------------------|------|------|------|
| Nr podkl.                                                                                                                                     | week | LS medium variant | mg/100 g DM Średnie | 1    | 2    | 3    |
| 4                                                                                                                                             | 5    | 0,5/1             | 29,08603            | **** |      |      |
| 5                                                                                                                                             | 5    | 0,1/0,1           | 36,36648            | **** |      |      |
| 1                                                                                                                                             | 4    | 0,5/1             | 54,97331            |      | **** |      |
| 2                                                                                                                                             | 4    | 0,1/0,1           | 55,65548            |      | **** |      |
| 3                                                                                                                                             | 4    | 1,0/1,0           | 75,57795            |      |      | **** |
| 6                                                                                                                                             | 5    | 1,0/1,0           | 84,48151            |      |      | **** |

## Psoralen

| Test NIR; zmienna mg/100 g DM (rch Rity publ Life do statystyki)<br>Prawdopodobieństwa dla testów post-hoc<br>Błąd: MS międzygrupowe = 709,29, df = 12,000 |      |                   |          |          |          |          |          |          |
|------------------------------------------------------------------------------------------------------------------------------------------------------------|------|-------------------|----------|----------|----------|----------|----------|----------|
| Nr podkl.                                                                                                                                                  | week | LS medium variant | {1}      | {2}      | {3}      | {4}      | {5}      | {6}      |
| 1                                                                                                                                                          | 4    | 0,5/1             | 222,29   | 217,83   | 125,88   | 208,31   | 218,54   | 119,58   |
| 2                                                                                                                                                          | 4    | 0,1/0,1           | 0,840918 | 0,840918 | 0,000816 | 0,532554 | 0,866071 | 0,000494 |
| 3                                                                                                                                                          | 4    | 1,0/1,0           | 0,000816 | 0,001172 | 0,001172 | 0,669515 | 0,974361 | 0,000704 |
| 4                                                                                                                                                          | 5    | 0,5/1             | 0,532554 | 0,669515 | 0,002573 | 0,002573 | 0,001105 | 0,776756 |
| 5                                                                                                                                                          | 5    | 0,1/0,1           | 0,866071 | 0,974361 | 0,002573 | 0,646558 | 0,646558 | 0,001524 |
| 6                                                                                                                                                          | 5    | 1,0/1,0           | 0,000494 | 0,000704 | 0,776756 | 0,001524 | 0,000665 | 0,000665 |

| Test NIR; zmienna mg/100 g DM (rch Rity publ Life do statystyki) Grupy jednorodne, alfa = ,05000 Błąd: MS międzygrupowe = 709,29, df = 12,000 |      |                   |                     |      |      |
|-----------------------------------------------------------------------------------------------------------------------------------------------|------|-------------------|---------------------|------|------|
| Nr podkl.                                                                                                                                     | week | LS medium variant | mg/100 g DM Średnie | 1    | 2    |
| 6                                                                                                                                             | 5    | 1,0/1,0           | 119,5755            |      | **** |
| 3                                                                                                                                             | 4    | 1,0/1,0           | 125,8819            |      | **** |
| 4                                                                                                                                             | 5    | 0,5/1             | 208,3138            | **** |      |
| 2                                                                                                                                             | 4    | 0,1/0,1           | 217,8275            | **** |      |
| 5                                                                                                                                             | 5    | 0,1/0,1           | 218,5411            | **** |      |
| 1                                                                                                                                             | 4    | 0,5/1             | 222,2878            | **** |      |

## Isoimperatorin

| Test NIR; zmienna mg/100 g DM (rch Rity publ Life do statystyki)<br>Prawdopodobieństwa dla testów post-hoc<br>Błąd: MS międzygrupowe = 44,954, df = 12,000 |      |                   |          |          |          |          |          |          |
|------------------------------------------------------------------------------------------------------------------------------------------------------------|------|-------------------|----------|----------|----------|----------|----------|----------|
| Nr podkl.                                                                                                                                                  | week | LS medium variant | {1}      | {2}      | {3}      | {4}      | {5}      | {6}      |
| 1                                                                                                                                                          | 4    | 0,5/1             | 54,460   | 50,284   | 43,587   | 42,092   | 49,614   | 50,564   |
| 2                                                                                                                                                          | 4    | 0,1/0,1           | 0,460295 | 0,460295 | 0,070350 | 0,043264 | 0,393404 | 0,490253 |
| 3                                                                                                                                                          | 4    | 1,0/1,0           | 0,070350 | 0,244713 | 0,244713 | 0,160359 | 0,904580 | 0,960063 |
| 4                                                                                                                                                          | 5    | 0,5/1             | 0,043264 | 0,160359 | 0,789320 |          | 0,292569 | 0,226654 |
| 5                                                                                                                                                          | 5    | 0,1/0,1           | 0,393404 | 0,904580 | 0,292569 | 0,194548 | 0,194548 | 0,147672 |
| 6                                                                                                                                                          | 5    | 1,0/1,0           | 0,490253 | 0,960063 | 0,226654 | 0,147672 | 0,865100 | 0,865100 |

| Test NIR; zmienna mg/100 g DM (rch Rity publ Life do statystyki) Grupy jednorodne, alfa = ,05000 Błąd: MS międzygrupowe = 44,954, df = 12,000 |      |                   |                     |      |      |
|-----------------------------------------------------------------------------------------------------------------------------------------------|------|-------------------|---------------------|------|------|
| Nr podkl.                                                                                                                                     | week | LS medium variant | mg/100 g DM Średnie | 1    | 2    |
| 4                                                                                                                                             | 5    | 0,5/1             | 42,09158            | **** |      |
| 3                                                                                                                                             | 4    | 1,0/1,0           | 43,58737            | **** | **** |
| 5                                                                                                                                             | 5    | 0,1/0,1           | 49,61368            | **** | **** |
| 2                                                                                                                                             | 4    | 0,1/0,1           | 50,28395            | **** | **** |
| 6                                                                                                                                             | 5    | 1,0/1,0           | 50,56385            | **** | **** |
| 1                                                                                                                                             | 4    | 0,5/1             | 54,46002            |      | **** |

## Total furanocoumarins

| Test NIR; zmienna mg/100 g DM (rch Rity publ Life do statystyki)<br>Prawdopodobieństwa dla testów post-hoc<br>Błąd: MS międzygrupowe = 5586,8, df = 12,000 |      |                   |          |          |          |          |          |          |
|------------------------------------------------------------------------------------------------------------------------------------------------------------|------|-------------------|----------|----------|----------|----------|----------|----------|
| Nr podkl.                                                                                                                                                  | week | LS medium variant | {1}      | {2}      | {3}      | {4}      | {5}      | {6}      |
| 1                                                                                                                                                          | 4    | 0,5/1             | 1169,0   | 1124,6   | 756,29   | 840,89   | 921,05   | 847,34   |
| 2                                                                                                                                                          | 4    | 0,1/0,1           | 0,480636 | 0,480636 | 0,000020 | 0,000166 | 0,001572 | 0,000197 |
| 3                                                                                                                                                          | 4    | 1,0/1,0           | 0,000020 | 0,000059 | 0,000059 | 0,000561 | 0,005935 | 0,000674 |
| 4                                                                                                                                                          | 5    | 0,5/1             | 0,000020 | 0,000059 | 0,190904 | 0,190904 | 0,019322 | 0,161555 |
| 5                                                                                                                                                          | 5    | 0,1/0,1           | 0,000166 | 0,000561 | 0,190904 | 0,213594 | 0,213594 | 0,917607 |
| 6                                                                                                                                                          | 5    | 1,0/1,0           | 0,001572 | 0,005935 | 0,019322 | 0,213594 |          | 0,250392 |
|                                                                                                                                                            |      |                   | 0,000197 | 0,000674 | 0,161555 | 0,917607 | 0,250392 |          |

| Test NIR; zmienna mg/100 g DM (rch Rity publ Life do statystyki) Grupy jednorodne, alfa = ,05000 Błąd: MS międzygrupowe = 5586,8, df = 12,000 |      |                   |                     |      |      |      |
|-----------------------------------------------------------------------------------------------------------------------------------------------|------|-------------------|---------------------|------|------|------|
| Nr podkl.                                                                                                                                     | week | LS medium variant | mg/100 g DM Średnie | 1    | 2    | 3    |
| 3                                                                                                                                             | 4    | 1,0/1,0           | 756,294             | **** |      |      |
| 4                                                                                                                                             | 5    | 0,5/1             | 840,891             | **** | **** |      |
| 6                                                                                                                                             | 5    | 1,0/1,0           | 847,339             | **** | **** |      |
| 5                                                                                                                                             | 5    | 0,1/0,1           | 921,049             |      | **** |      |
| 2                                                                                                                                             | 4    | 0,1/0,1           | 1124,623            |      |      | **** |
| 1                                                                                                                                             | 4    | 0,5/1             | 1169,046            |      |      | **** |

## Skimmianine

| Test NIR; zmienna mg/100 g DM (rch Rity publ Life do statystyki)<br>Prawdopodobieństwa dla testów post-hoc<br>Błąd: MS międzygrupowe = 118,61, df = 12,000 |      |                   |          |          |          |          |          |          |
|------------------------------------------------------------------------------------------------------------------------------------------------------------|------|-------------------|----------|----------|----------|----------|----------|----------|
| Nr podkl.                                                                                                                                                  | week | LS medium variant | {1}      | {2}      | {3}      | {4}      | {5}      | {6}      |
| 1                                                                                                                                                          | 4    | 0,5/1             | 143,18   | 122,44   | 74,305   | 192,64   | 291,59   | 213,53   |
| 2                                                                                                                                                          | 4    | 0,1/0,1           | 0,037861 | 0,037861 | 0,000005 | 0,000124 | 0,000000 | 0,000004 |
| 3                                                                                                                                                          | 4    | 1,0/1,0           | 0,000005 | 0,000157 | 0,000157 | 0,000004 | 0,000000 | 0,000000 |
| 4                                                                                                                                                          | 5    | 0,5/1             | 0,000124 | 0,000004 | 0,000000 | 0,000000 | 0,000000 | 0,036768 |
| 5                                                                                                                                                          | 5    | 0,1/0,1           | 0,000000 | 0,000000 | 0,000000 | 0,000000 | 0,000000 | 0,000001 |
| 6                                                                                                                                                          | 5    | 1,0/1,0           | 0,000004 | 0,000000 | 0,000000 | 0,036768 | 0,000001 |          |

| Test NIR; zmienna mg/100 g DM (rch Rity publ Life do statystyki) Grupy jednorodne, alfa = ,05000 Błąd: MS międzygrupowe = 118,61, df = 12,000 |      |                   |                     |      |      |      |      |      |      |
|-----------------------------------------------------------------------------------------------------------------------------------------------|------|-------------------|---------------------|------|------|------|------|------|------|
| Nr podkl.                                                                                                                                     | week | LS medium variant | mg/100 g DM Średnie | 1    | 2    | 3    | 4    | 5    | 6    |
| 3                                                                                                                                             | 4    | 1,0/1,0           | 74,3046             | **** |      |      |      |      |      |
| 2                                                                                                                                             | 4    | 0,1/0,1           | 122,4374            |      | **** |      |      |      |      |
| 1                                                                                                                                             | 4    | 0,5/1             | 143,1838            |      |      | **** |      |      |      |
| 4                                                                                                                                             | 5    | 0,5/1             | 192,6365            |      |      |      | **** |      |      |
| 6                                                                                                                                             | 5    | 1,0/1,0           | 213,5264            |      |      |      |      | **** |      |
| 5                                                                                                                                             | 5    | 0,1/0,1           | 291,5940            |      |      |      |      |      | **** |

## γ-fagarine

| Test NIR; zmienna mg/100 g DM (rch Rity publ Life do statystyki)<br>Prawdopodobieństwa dla testów post-hoc<br>Błąd: MS międzygrupowe = 327,48, df = 12,000 |      |                   |          |          |          |          |          |          |
|------------------------------------------------------------------------------------------------------------------------------------------------------------|------|-------------------|----------|----------|----------|----------|----------|----------|
| Nr podkl.                                                                                                                                                  | week | LS medium variant | {1}      | {2}      | {3}      | {4}      | {5}      | {6}      |
| 1                                                                                                                                                          | 4    | 0,5/1             | 135,44   | 186,88   | 124,47   | 98,968   | 143,84   | 136,73   |
| 2                                                                                                                                                          | 4    | 0,1/0,1           | 0,004537 | 0,004537 | 0,472114 | 0,029574 | 0,580184 | 0,932002 |
| 3                                                                                                                                                          | 4    | 1,0/1,0           | 0,472114 | 0,001182 | 0,001182 | 0,000067 | 0,013018 | 0,005329 |
| 4                                                                                                                                                          | 5    | 0,5/1             | 0,029574 | 0,000067 | 0,109960 | 0,109960 | 0,010331 | 0,025202 |
| 5                                                                                                                                                          | 5    | 0,1/0,1           | 0,580184 | 0,013018 | 0,214419 | 0,010331 |          | 0,638921 |
| 6                                                                                                                                                          | 5    | 1,0/1,0           | 0,932002 | 0,005329 | 0,422985 | 0,025202 | 0,638921 |          |

| Test NIR; zmienna mg/100 g DM (rch Rity publ Life do statystyki) Grupy jednorodne, alfa = ,05000 Błąd: MS międzygrupowe = 327,48, df = 12,000 |      |                   |                     |      |      |      |
|-----------------------------------------------------------------------------------------------------------------------------------------------|------|-------------------|---------------------|------|------|------|
| Nr podkl.                                                                                                                                     | week | LS medium variant | mg/100 g DM Średnie | 1    | 2    | 3    |
| 4                                                                                                                                             | 5    | 0,5/1             | 98,9683             |      | **** |      |
| 3                                                                                                                                             | 4    | 1,0/1,0           | 124,4725            | **** | **** |      |
| 1                                                                                                                                             | 4    | 0,5/1             | 135,4423            | **** |      |      |
| 6                                                                                                                                             | 5    | 1,0/1,0           | 136,7298            | **** |      |      |
| 5                                                                                                                                             | 5    | 0,1/0,1           | 143,8421            | **** |      |      |
| 2                                                                                                                                             | 4    | 0,1/0,1           | 186,8777            |      |      | **** |

## 7-isopentenyloxy- $\gamma$ -fagarine

| Nr podkl. | Test NIR; zmienna mg/100 g DM (rch Rity publ Life do statystyki)<br>Prawdopodobieństwa dla testów post-hoc<br>Błąd: MS międzygrupowe = 2,8911, df = 12,000 |                   |          |          |          |          |          |          |
|-----------|------------------------------------------------------------------------------------------------------------------------------------------------------------|-------------------|----------|----------|----------|----------|----------|----------|
|           | week                                                                                                                                                       | LS medium variant | {1}      | {2}      | {3}      | {4}      | {5}      | {6}      |
| 1         | 4                                                                                                                                                          | 0,5/1             | 13,249   | 16,786   | 0,139223 | 0,882300 | 0,987788 | 0,139060 |
| 2         | 4                                                                                                                                                          | 0,1/0,1           | 0,025583 | 0,025583 | 0,354215 | 0,019354 | 0,024858 | 0,354559 |
| 3         | 4                                                                                                                                                          | 1,0/1,0           | 0,139223 | 0,354215 |          | 0,108317 | 0,135706 | 0,999441 |
| 4         | 5                                                                                                                                                          | 0,5/1             | 0,882300 | 0,019354 | 0,108317 |          | 0,894377 | 0,108186 |
| 5         | 5                                                                                                                                                          | 0,1/0,1           | 0,987788 | 0,024858 | 0,135706 | 0,894377 |          | 0,135547 |
| 6         | 5                                                                                                                                                          | 1,0/1,0           | 0,139060 | 0,354559 | 0,999441 | 0,108186 | 0,135547 |          |

| Nr podkl. | Test NIR; zmienna mg/100 g DM (rch Rity publ Life do statystyki) Grupy jednorodne, alfa = ,05000 Błąd: MS międzygrupowe = 2,8911, df = 12,000 |                   |                     |      |      |      |
|-----------|-----------------------------------------------------------------------------------------------------------------------------------------------|-------------------|---------------------|------|------|------|
|           | week                                                                                                                                          | LS medium variant | mg/100 g DM Średnie | 1    | 2    |      |
| 4         | 5                                                                                                                                             | 0,5/1             | 13,03901            | **** |      |      |
| 5         | 5                                                                                                                                             | 0,1/0,1           | 13,22728            | **** |      |      |
| 1         | 4                                                                                                                                             | 0,5/1             | 13,24898            | **** |      |      |
| 3         | 4                                                                                                                                             | 1,0/1,0           | 15,44778            | **** | **** |      |
| 6         | 5                                                                                                                                             | 1,0/1,0           | 15,44877            | **** | **** |      |
| 2         | 4                                                                                                                                             | 0,1/0,1           | 16,78568            |      |      | **** |

## Total furoquinoline alkaloids

| Nr podkl. | Test NIR; zmienna mg/100 g DM (rch Rity publ Life do statystyki)<br>Prawdopodobieństwa dla testów post-hoc<br>Błąd: MS międzygrupowe = 556,35, df = 12,000 |                   |          |          |          |          |          |          |
|-----------|------------------------------------------------------------------------------------------------------------------------------------------------------------|-------------------|----------|----------|----------|----------|----------|----------|
|           | week                                                                                                                                                       | LS medium variant | {1}      | {2}      | {3}      | {4}      | {5}      | {6}      |
| 1         | 4                                                                                                                                                          | 0,5/1             | 291,88   | 326,10   | 214,22   | 304,64   | 448,66   | 365,70   |
| 2         | 4                                                                                                                                                          | 0,1/0,1           | 0,100877 | 0,100877 | 0,001663 | 0,519859 | 0,000003 | 0,002380 |
| 3         | 4                                                                                                                                                          | 1,0/1,0           | 0,001663 | 0,000084 | 0,000084 | 0,287040 | 0,000036 | 0,062164 |
| 4         | 5                                                                                                                                                          | 0,5/1             | 0,519859 | 0,287040 | 0,000519 | 0,000519 | 0,000000 | 0,000004 |
| 5         | 5                                                                                                                                                          | 0,1/0,1           | 0,000003 | 0,000036 | 0,000000 | 0,000007 | 0,000007 | 0,008061 |
| 6         | 5                                                                                                                                                          | 1,0/1,0           | 0,002380 | 0,062164 | 0,000004 | 0,008061 | 0,001018 | 0,001018 |

| Nr podkl. | Test NIR; zmienna mg/100 g DM (rch Rity publ Life do statystyki) Grupy jednorodne, alfa = ,05000 Błąd: MS międzygrupowe = 556,35, df = 12,000 |                   |                     |      |      |      |   |      |
|-----------|-----------------------------------------------------------------------------------------------------------------------------------------------|-------------------|---------------------|------|------|------|---|------|
|           | week                                                                                                                                          | LS medium variant | mg/100 g DM Średnie | 1    | 2    | 3    | 4 |      |
| 3         | 4                                                                                                                                             | 1,0/1,0           | 214,2248            |      |      | **** |   |      |
| 1         | 4                                                                                                                                             | 0,5/1             | 291,8751            | **** |      |      |   |      |
| 4         | 5                                                                                                                                             | 0,5/1             | 304,6438            | **** |      |      |   |      |
| 2         | 4                                                                                                                                             | 0,1/0,1           | 326,1008            | **** | **** |      |   |      |
| 6         | 5                                                                                                                                             | 1,0/1,0           | 365,7049            |      | **** |      |   |      |
| 5         | 5                                                                                                                                             | 0,1/0,1           | 448,6634            |      |      |      |   | **** |
